# Supplementary material for: Entrapment Predicts First-Onset Suicidal Ideation: A Longitudinal Study in Medical Students
Source: Research Square preprint supplement (doi:10.21203/rs.3.rs-1222696/v1), 2022-01-18
Supplement: Supplementary file 1 [file a69a267f29f104ca86356123.docx]

**Supplement materials**

**Table S1. Socio-demographic variables at overall and follow-up samples.**

|  |  | **Baseline(T0=550)** | | **Follow-up(T1=303)** | |
| --- | --- | --- | --- | --- | --- |
| **Variables** | | **Frequency** | **Percentage** | **Frequency** | **Percentage** |
| Gender(T0) |  |  |  |  |  |
|  | Male | 180 | 46.88 | 95 | 45.02 |
|  | Female | 204 | 53.13 | 116 | 54.98 |
| Major(T0) |  |  |  |  |  |
|  | Clinical medicine | 301 | 78.39 | 162 | 76.78 |
|  | Non-clinical medicine | 83 | 21.61 | 49 | 23.22 |
| Parents’ income(T0) |  |  |  |  |  |
|  | Low | 37 | 9.64 | 26 | 12.32 |
|  | Average | 238 | 61.98 | 139 | 65.88 |
|  | High | 109 | 28.39 | 46 | 21.80 |
| Academic performance(T0) | |  |  |  |  |
|  | Poor | 67 | 17.45 | 35 | 16.59 |
|  | Average | 215 | 55.99 | 123 | 58.29 |
|  | Good | 102 | 26.56 | 53 | 25.12 |
| Past-year suicidal ideation(T1) | |  |  |  |  |
|  | Yes | N.A. | N.A. | 13 | 6.16 |
|  | No | N.A. | N.A. | 198 | 93.84 |

**Table S2. Socio-demographic variables among 4 subgroups(N,%).**

| **Variables** | | **New-onset** | | **Reduced** | | **Persistent** | | **Control** | | **χ2** | **p** |
| --- | --- | --- | --- | --- | --- | --- | --- | --- | --- | --- | --- |
| Gender |  |  |  |  |  |  |  |  |  |  |  |
|  | Male | 15 | 40.54% | 15 | 78.95% | 12 | 44.44% | 53 | 41.41% | 9.814 | 0.020 |
|  | Female | 22 | 59.46% | 4 | 21.05% | 15 | 55.56% | 75 | 58.59% |
| Major |  |  |  |  |  |  |  |  |  |  |  |
|  | Clinical medicine | 28 | 75.68% | 17 | 89.47% | 18 | 66.67% | 99 | 77.34% | 3.314 | 0.346 |
|  | Non-clinical medicine | 9 | 24.32% | 2 | 10.53% | 9 | 33.33% | 29 | 22.66% |
| Income |  |  |  |  |  |  |  |  |  |  |  |
|  | Low | 3 | 8.11% | 0 | 0.00% | 6 | 22.22% | 17 | 13.28% | 7.390 | 0.286 |
|  | Average | 23 | 62.16% | 14 | 73.68% | 17 | 62.96% | 85 | 66.41% |
|  | High | 11 | 29.73% | 5 | 26.32% | 4 | 14.81% | 26 | 20.31% |
| Academic performance | |  |  |  |  |  |  |  |  |  |  |
|  | Poor | 3 | 8.11% | 4 | 21.05% | 7 | 25.93% | 21 | 16.41% | 6.910 | 0.329 |
|  | Average | 22 | 59.46% | 8 | 42.11% | 15 | 55.56% | 78 | 60.94% |
|  | Good | 12 | 32.43% | 7 | 36.84% | 5 | 18.52% | 29 | 22.66% |
